# Supplementary material for: RNA Structural Requirements for Nucleocapsid Protein-Mediated Extended Dimer Formation
Source: MDPI journal article supplement (doi:10.3390/v14030606), 2022-03-15
Supplement: s1 [file s1]

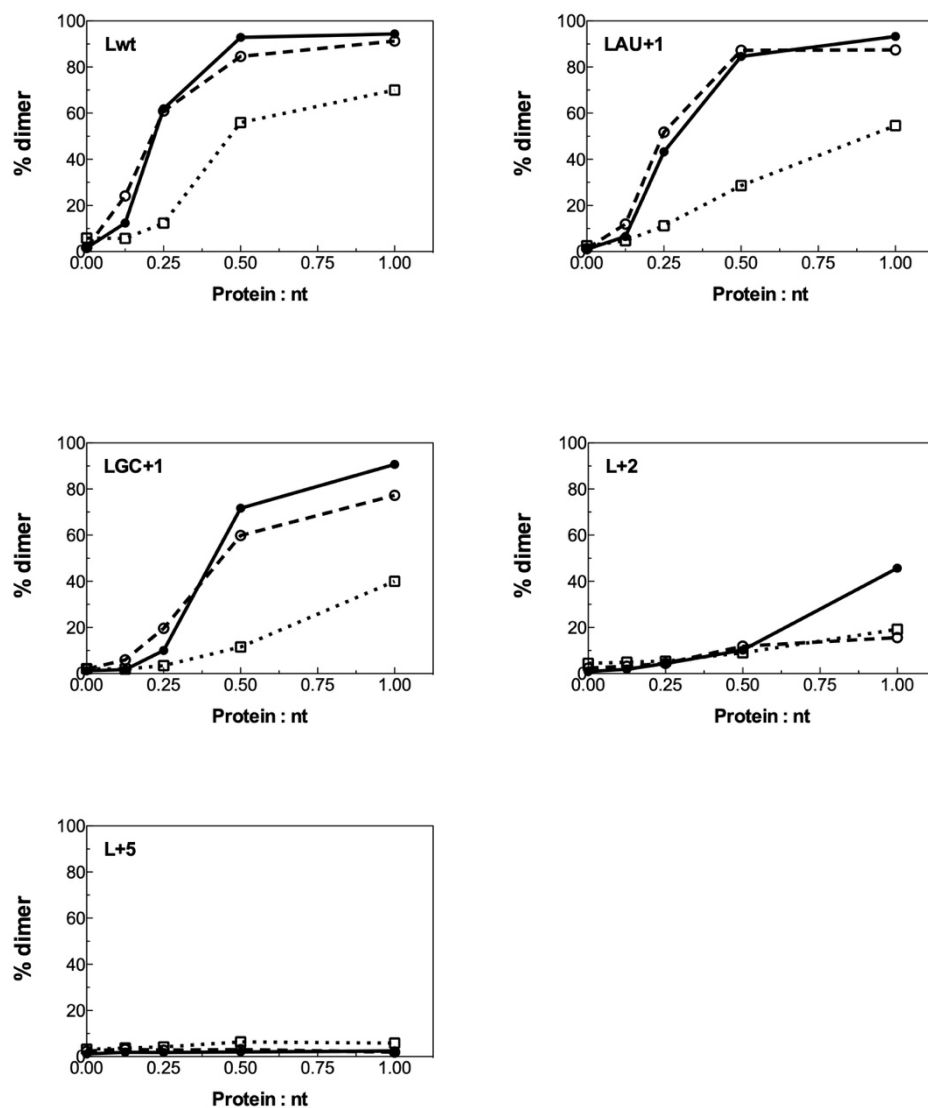

**Figure S1.** Influence of stem C extensions on L3 RNA dimerization induced by three different retroviral NCs. Data are derived from experiments shown in Figures 7 and 8. Filled circles, NCp12; open circles, NCp7; open squares, NCp10.
